# Supplementary material for: Aluminosugilite, KNa&lt;sub&gt;2&lt;/sub&gt;Al&lt;sub&gt;2&lt;/sub&gt;Li&lt;sub&gt;3&lt;/sub&gt;Si&lt;sub&gt;12&lt;/sub&gt;O&lt;sub&gt;30&lt;/sub&gt;, an Al analogue of sugilite, from the Cerchiara mine, Liguria, Italy
Source: Copernicus journal article supplement (doi:10.5194/ejm-32-57-2020), 2020-01-16
Supplement: Supplementary file 1 [file ejm-32-57-2020-supplement.zip]

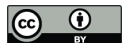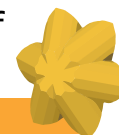

*Supplement of*

**Aluminosugilite,  $\text{KNa}_2\text{Al}_2\text{Li}_3\text{Si}_{12}\text{O}_{30}$ , an Al analogue of sugilite, from the Cerchiara mine, Liguria, Italy**

**Mariko Nagashima et al.**

*Correspondence to:* Mariko Nagashima ([nagashim@yamaguchi-u.ac.jp](mailto:nagashim@yamaguchi-u.ac.jp))

- [ejm-32-57-2020-supplement-title-page.pdf](#)
- [Supplement.xlsx](#)

The copyright of individual parts of the supplement might differ from the CC BY 4.0 License.
