# Supplementary material for: Aluminosugilite, KNa&lt;sub&gt;2&lt;/sub&gt;Al&lt;sub&gt;2&lt;/sub&gt;Li&lt;sub&gt;3&lt;/sub&gt;Si&lt;sub&gt;12&lt;/sub&gt;O&lt;sub&gt;30&lt;/sub&gt;, an Al analogue of sugilite, from the Cerchiara mine, Liguria, Italy
Source: Copernicus journal article supplement (doi:10.5194/ejm-32-57-2020), 2020-01-16
Supplement: Supplementary file 1 [file Supplement.xlsx]

## Sheet: Table S1(R2)
Table S1. Chemical formulae, dominant cation at A, B, C, T1 and T2 sites in milarite-group minerals, and their chemical relationsa.
General formula of milarite group minerals: CB2A2(T2)3(T1)12O30 (e.g. Forbes et al., 1972)
Mineral name	Chemical formulab		Space group/ crystal system		Dominant cation at each site						Homovalent subsitution							Heterovalent substition							Referencesd
					A2	B2	C	T23	T112		A site				C site			Among A, B and T2 sites
Aluminosugilite	KNa2Al2Li3Si12O30		P6/mcc		Al2	Na2	K	Li3	Si12				Al ↔ Fe ↔ Mn							2Me3+ (A) + 2Li (T2) ↔ 2Mn2+ (A) + 2Zn (T2)					This study
Sugilite	KNa2(Fe3+, Al, Mn3+)2Li3Si12O30		P6/mcc		Fe3+2	Na2	K	Li3	Si12																1, 2, 3
Darapiosite	K(Na,◻,K)2(Mn, Zr, Y)2(Li ,Zn, Fe)3Si12O30		P6/mcc		Mn2	Na2	K	LiZn2	Si12																4, 5
Osumilite	K□2Fe2+2Al3(Al2Si10)O30		P6/mcc		Fe2+2	□2	K	Al3	Si10Al2				Fe ↔ Mg												6, 7
Osumilite-(Mg)	K□2Mg2Al3(Al2Si10)O30		P6/mcc		Mg2	□2	K	Al3	Si10Al2							K ↔ Na									8, 9
Yagiite	(Na, K)3Mg4(Al, Mg)6(Si, Al)24O60		Hexagonal		Mg2	□2	Na	Al3	Si10Al2																10
Berezanskite	K□2(Ti, Zr, Sn)2Li3Si12O30		P6/mcc		Ti2	□2	K	Li3	Si12				Ti ↔ Sn ↔ Zr												11, 12
Brannockite	(K, Na)□2(Sn, Zr, Ti)2Li3Si12O30		P6/mcc		Sn2	□2	K	Li3	Si12																3, 13
Sogdianite	K(□, Na)2(Zr, Fe, Ti)2Li3Si12O30		P6/mcc		Zr2	□2	K	Li3	Si12																14, 15, 16
Chayesite	(K, Na)□2(Mg, Fe3+)2(Mg, Fe3+)3Si12O30		P6/mcc		Mg2	□2	K	Mg2Fe3+	Si12															Fe3+ (T2) ↔ Na (B) + Mg (T2)	17, 18
Roedderite	(Na, K)2(Mg, Fe)5Si12O30		P-62c*3		Mg2	Na□	K	Mg3	Si12											Na (A) + Na (B) ↔ Mg (A)					19, 20
Eifelite	KNa3Mg4Si12O30		Hexagonal		MgNa	Na2	K	Mg3	Si12																21
Shibkovite	K(□, K, Na)2Ca2Zn3Si12O30		P6/mcc		Ca2	K□	K	Zn3	Si12				Ca ↔ Mn							2(Ca, Mn) (A) + K (B) ↔ Fe2+ (A) + Fe3+ (A)					22, 23
Dusmatovite	K(Na, □)2(Mn2+, Y, Zr)2(Zn, Li)3Si12O30		P6/mcc		Mn2	K□	K	Zn3	Si12																24, 25
Klöchite	K(□, Na)K(Fe2+Fe3+)2Zn3Si12O30		P6/mcc		Fe2+Fe3+	□2	K	Zn3	Si12																26
Friedrichbeckeite	K(□0.5Na0.5)2Mg2Be3Si12O30		P6/mcc		Mg2	Na□	K	Be3	Si12											Mg (A) + Na (B) ↔ Y, Sc (A)					27
Agakhanovite-(Y)	K(Y, Ca)2□2Be3Si12O30		P6/mcc		YCa	□2	K	Be3	Si12				Y ↔ Sc											Y, Sc (A) + Be (T2) ↔ Ca, Mn (A) + Al (T2)	28
Oftedalite	K(Sc, Ca, Mn2+)2◻2(Be, Al)3Si12O30		P6/mcc		ScCa	□2	K	Be3	Si12																29
Milarite	K2Ca4Al2Be4Si24O60・H2O		P6/mcc		Ca2	□2	K	Be2Al	Si12				Ca ↔ Mn												30, 31
Almarudite	K(□, Na)2(Mn2+, Fe2+, Mg)2(Be, Al)3Si12O30		P6/mcc		Mn2	□2	K	Be2Al	Si12																32
Merrihueite	(K, Na)2(Fe, Mg)5Si12O30		P6/mcc		Fe2+2	Na□	K	Fe2+3	Si12																33
Poudretteite	KNa2□2B3Si12O30		P6/mcc		Na2	□2	K	B3	Si12																34
Trattnerite	□3(Fe3+, Mg, Fe2+)2(Mg ,Fe2+, Fe3+)3Si12O30		P6/mcc		Fe3+2	□2	□	Mg3	Si12																35
Armenite	Ba□2Ca2Al6Si9O30 · 2H2O		Pnna/Pnc2c		Ca2	□2	Ba	Al3	Si9Al3																36, 37, 38
a This Table was prepared after table 2 in Gagné and Hawthorne (2016). H2O molecule in the B channels is omitted. Homovalent and heterovalent substitutions among species are based on the dominant cation, and the difference of their formation condition is not considered.
b Chemical formula of each mineral is represented after the general formula of milarite group suggested by Forbes et al. (1972).
c Na order arrangement in roedderite, and Si-Al order in armerite reduce space group from P6/mcc (Armbruster, 1989, 1999).
d References are as follows; (1) Murakami et al., 1976; (2) Kato et al., 1976; (3) Armbruster and Oberhänsli, 1988b; (4) Semenov et al., 1975; (5) Ferraris et al., 1999; (6) Miyashiro, 1956; (7) Armbruster and Oberhänsli, 1988a; (8) Chukanov et al., 2013; (9) Balassone et al., 2008; (10) Bunch and Fuchs, 1969; (11) Pautov and Agakhanov, 1997; (12) Hawthorne et al., 2016; (13) White et al., 1973; …

## Sheet: TS2 separate
Table S2. Observed X-ray powder diffraction data with CuK radiation (l = 1.5418 Å) and calculated pattern based on X-ray single-crystal refinement for aluminosugilite.
			Calculated pattern				Observed X-ray powder pattern							Calculated pattern				Observed X-ray powder pattern
h	k	l	2°	dcalc.	Icalc.		2°	dmeas.	Imeas.		h	k	l	2°	dcalc.	Icalc.		2°	dmeas.	Imeas.
1	0	0	10.223	8.64553	3.188						3	2	2	47.623	1.90796	3.227
0	0	2	12.666	6.98335	12.186		12.69	6.97	6.64053		4	1	0	48.196	1.88661	8.046		48.293	1.8831	4.57168
1	1	0	17.755	4.9915	1.751		17.697	5.008	1.65212		4	1	1	48.662	1.86963	18.402		48.74	1.8668	14.043
2	0	0	20.529	4.32277	100		20.565	4.3154	100		3	2	3	49.94	1.82473	1.95		50.123	1.8185	7.79701
1	1	2	21.869	4.06082	46.466		21.885	4.058	37.6362		4	1	2	50.04	1.82132	2.683
2	0	2	24.195	3.67556	14.112		24.2101	3.67325	14.4326		3	1	5	50.095	1.81943	15.916
0	0	4	25.49	3.49167	36.451		25.551	3.4835	29.5384		3	0	6	50.35	1.81084	3.958
2	1	0	27.269	3.2677	10.363		27.306	3.2634	14.4079		4	1	3	52.278	1.7485	1.753
1	0	4	27.528	3.2376	10.29		27.577	3.2319	8.38635		0	0	8	52.363	1.74584	11.688		52.46	1.7428	5.0254
2	1	1	28.021	3.18178	92.978		28.044	3.1792	92.0279		2	1	7	53.788	1.7029	2.254		53.88	1.70021	5.57775
2	1	2	30.171	2.95971	2.623		30.192	2.9577	4.12043		2	2	6	53.81	1.70228	11.529
3	0	0	31.006	2.88184	7.151		31.28	2.8572	69.8649		4	1	4	55.302	1.65982	11.783		55.358	1.65828	6.34709
1	1	4	31.237	2.86113	93.037						2	0	8	56.829	1.6188	6.263		56.88	1.6174	2.53489
2	0	4	32.949	2.71625	25.062		32.989	2.7131	18.3977		4	1	5	59.036	1.56343	2.264
2	1	3	33.477	2.67463	13.031		33.513	2.6718	9.95216		5	1	1	59.885	1.54327	11.3		59.957	1.5416	5.86872
3	0	2	33.615	2.66393	2.364						4	2	3	59.954	1.54167	1.648
2	2	0	35.955	2.49575	25.2		36.01	2.492	18.3977		3	3	4	61.706	1.50202	16.275		61.754	1.501	6.70464
3	1	0	37.477	2.39784	7.34		37.551	2.3932	6.46052		3	0	8	62.111	1.49321	4.319
2	1	4	37.672	2.38587	1.266						5	1	3	63.059	1.47301	2.676
3	1	1	38.046	2.36326	3.622						6	0	0	64.632	1.44092	1.565
0	0	6	38.649	2.32778	1.768		38.663	2.3269	2.21433		2	2	8	65.157	1.43057	14.912		65.267	1.4284	4.09084
3	1	2	39.712	2.26787	4.108		39.776	2.2644	3.91823		4	3	1	66.016	1.41401	5.489		66.1	1.4125	2.94915
1	0	6	40.083	2.24774	2.506		40.151	2.2441	1.54609		6	0	2	66.165	1.41119	3.875
3	0	4	40.556	2.2226	9.024		40.613	2.2196	5.21527		2	1	9	66.666	1.40181	2.766
3	1	3	42.366	2.13171	10.087		42.422	2.129	8.41841		5	2	0	67.616	1.38439	13.844		67.665	1.3835	4.75169
4	0	2	43.81	2.06475	3.243		43.91	2.0605	2.34749		5	2	1	67.993	1.37764	6.16
2	2	4	44.591	2.03041	1.509		44.74	2.024	1.02579		4	1	7	68.377	1.37083	3.56
3	2	0	45.706	1.98342	6.535		45.922	1.9746	8.18415		5	1	5	69.162	1.35719	5.962		69.235	1.3559	2.45105
3	1	4	45.872	1.97663	13.506						1	1	10	69.878	1.34501	2.332
